# Supplementary material for: Large-scale identification of plasma membrane repair proteins revealed spatiotemporal cellular responses to plasma membrane damage
Source: eLife. 2026 Mar 10;14:RP108585. doi: 10.7554/eLife.108585 (PMC12975127; doi:10.7554/eLife.108585)
Supplement: Figure 2—source data 1. [file elife-108585-fig2-data1.xlsx]

## Sheet: Figure 2–Source Data
Figure 2–Source Data Repair protein candidates
C: The categorization of repair protein localization (Related to Fig. 2C)
D: TMD prediction by TMMH. Proteins with ExpAA>18 are considered to have TMD. (Related to Fig. 2C)
E: Median accumulation times of at least three replicates. The proteins that have several times indicated repeat the accumulation and dispersion several times. See Materials and methods for the definition of accumulation time. We defined the accumulation time as the time when the fluorescence intensity at the damaged site became greater than the fluorescence intensity at the non-damaged site by 3…
F: Standard deviation of accumulation times between replicates. The proteins that have several times indicated repeat the accumulation and dispersion several times.
G: Median retention times of at least three replicates. Retention time is defined as the difference between the accumulation time and the dispersion time. We defined the dispersion time when the fluorescence intensity at the damage site becomes less than that of the non-damaged site plus 3xSD for at least two consecutive time frames after the accumulation time. The proteins that have several time…
H: Standard deviation of retention times between replicates. The proteins that have several timings indicated repeat the accumulation and dispersion several times.
I-K: Restults of growth screening of repair protein deleted mutants in the indicated plates. S: The mutants showed sensitivity to the stress. N/A: The mutan is not viable or not included in the library (Related to Fig. S6)
L: Bud tip intensity changes. The ratio of the signal intensity at t = 0 and t = 10 min are shown. (Related to Fig. S10B)
M: known: the protein is reported to accumulate at the damage site in budding yeast
N: Description of the proteins.
Y_Number	Protein name	Localization_class	ExpAA (TMMH-prediction)	Accumulation_times (min)	Accumulation_times_sd (min)	Retention_times (min)	Retention_times_sd (min)	SDS sensitive	CWF sensitive	Heat sensitive	Bud tip intensity changes (10min/0min)	Known repair proteins in budding yeast	Description
YOR326W	Myo2	bud	0.43	2.5	1.9	22.5	1.9	N/A	N/A	N/A	0.165495	known	Type V myosin motor involved in actin-based transport of cargos; required for the polarized delivery of secretory vesicles, the vacuole, late Golgi elements, peroxisomes, lipid droplets, and the mitotic spindle; MYO2 has a paralog, MYO4, that arose from the whole genome duplication
YAL029C	Myo4	bud	0.19	4.5	3	15.75	8.7				0.35277	known	Type V myosin motor involved in actin-based transport of cargos; required for mRNA transport, including ASH1 mRNA, and facilitating the growth and movement of ER tubules into the growing bud along with She3p; MYO4 has a paralog, MYO2, that arose from the whole genome duplication
YBL047C	Ede1	bud	0.01	5 10	0.9 7.2	1.5 15	8.5 7.2				1.35697		Scaffold protein involved in the formation of early endocytic sites; putative regulator of cytokinesis; homo-oligomerization is required for localization to and organization of endocytic sites; has a network of interactions with other endocytic proteins; binds membranes in a ubiquitin-dependent manner; may also bind ubiquitinated membrane-associated proteins; interacts with Cmk2 and functions ups…
YBL007C	Sla1	Actin	0	5 9.5 13.5	0.3 3.3 2.5	2 1.5 11.5	2.6 2.2 6.7	S	S	S	0.77004		Cytoskeletal protein binding protein; required for assembly of the cortical actin cytoskeleton; interacts with proteins regulating actin dynamics and proteins required for endocytosis; found in the nucleus and cell cortex; has 3 SH3 domains
YKL129C	Myo3	Actin	3.63	4 11	4 9.3	1 2	9.2 11.4				1.06894		One of two type I myosins; localizes to actin cortical patches; deletion of MYO3 has little effect on growth, but myo3 myo5 double deletion causes severe defects in growth and actin cytoskeleton organization; MYO3 has a paralog, MYO5, that arose from the whole genome duplication
YHR158C	Kel1	bud	0	3.5	1.8	21.5	1.8				0.948744		Protein required for proper cell fusion and cell morphology; forms a complex with Bud14p and Kel2p that regulates Bnr1p (formin) to affect actin cable assembly, cytokinesis, and polarized growth; functions in a complex with Kel2p to negatively regulate mitotic exit, interacts with Tem1p and Lte1p; localizes to regions of polarized growth; potential Cdc28p substrate
YLR371W	Rom2	bud	6.63	2.5	1.5	22.5	1.5				0.445977		Guanine nucleotide exchange factor (GEF) for Rho1p and Rho2p; mutations are synthetically lethal with mutations in rom1, which also encodes a GEF; Rom2p localization to the bud surface is dependent on Ack1p; ROM2 has a paralog, ROM1, that arose from the whole genome duplication
YBL105C	Pkc1	bud	0	1	1.9	24	3.9	N/A	N/A	N/A	0.303997	known	Protein serine/threonine kinase; essential for cell wall remodeling during growth; localized to sites of polarized growth and the mother-daughter bud neck; homolog of the alpha, beta, and gamma isoforms of mammalian protein kinase C (PKC)
YOR188W	Msb1	bud	0	0.5	0.3	24.5	0.3				0.399497		Protein of unknown function; may be involved in positive regulation of 1,3-beta-glucan synthesis and the Pkc1p-MAPK pathway; multicopy suppressor of temperature-sensitive mutations in CDC24 and CDC42, and of mutations in BEM4; potential Cdc28p substrate; relocalizes from bud neck to cytoplasm upon DNA replication stress
YNL278W	Caf120	bud	0	6	3.1	19	4.5		S		0.22934		Part of the CCR4-NOT transcriptional regulatory complex; involved in controlling mRNA initiation, elongation, and degradation; contains a PH-like domain; CAF120 has a paralog, SKG3, that arose from the whole genome duplication
YLR187W	Skg3	bud	0.02	3.25	2.5	19.5	4.9				0.273487		Protein of unknown function; green fluorescent protein (GFP)-fusion protein localizes to the cell periphery, cytoplasm, bud, and bud neck; potential Cdc28p substrate; similar to Skg4p; relocalizes from bud neck to cytoplasm upon DNA replication stress; SKG3 has a paralog, CAF120, that arose from the whole genome duplication
YMR124W	Epo1	bud	0	5.25	0.9	19.75	0.9				0.376107		Protein involved in septin-ER tethering; interacts with ER membrane protein, Scs2p, and Shs1p, a septin ring component, at bud neck to create ER diffusion barrier; GFP-fusion protein localizes to the cell periphery, cytoplasm, bud, and bud neck; interacts with Crm1p in two-hybrid assay; YMR124W has a paralog, YLR031W, that arose from the whole genome duplication
YER047C	Sap1	bud	0	2.5	1.8	22.5	1.8				0.374796		Putative ATPase of the AAA family; interacts with the Sin1p transcriptional repressor in the two-hybrid system
YIL095W	Prk1	Actin	0.02	2.5 14	2.3 5.8	10.5 4	7.8 0.8				1.35089		Ser/Thr protein kinase; regulates the organization and function of the actin cytoskeleton; inhibits clathrin-mediated endocytosis; phosphorylates the Pan1p and Sla1p subunits of the Pan1p-Sla1p-End3p complex, resulting in inhibition of complex formation; inhibits Scd5p through phosphorylation; phosphorylates Pan1p-interacting proteins, Ent1/2 and Yap1801/2; negatively regulated through autophosph…
YPL032C	Svl3	bud	0.02	11.5	0.9	11	3.8		S		0.738397		Protein of unknown function; mutant phenotype suggests a potential role in vacuolar function; green fluorescent protein (GFP)-fusion protein localizes to the cell periphery, cytoplasm, bud, and bud neck; relocalizes from bud neck to cytoplasm upon DNA replication stress; SVL3 has a paralog, PAM1, that arose from the whole genome duplication
YLR319C	Bud6	bud	0	1.5	0.5	23	5.8				0.317432		Actin- and formin-interacting protein; nucleation-promoting factor (NPF) for Bni1p and Bnr1p during actin cable assembly and organization; enhances Bnr1p-mediated actin nucleation, alleviating Hof1p inhibition through competitive binding; interacts with Bni1p via a C-terminal triple helical coiled-coil domain; role in polarized cell growth; isolated as a bipolar budding mutant; localizes to the p…
YLR337C	Vrp1	Actin	0	4	0.8	13	9.8	S	S	S	0.763328		Verprolin, proline-rich actin-associated protein; involved in cytoskeletal organization and cytokinesis; promotes actin nucleation and endocytosis; related to mammalian Wiskott-Aldrich syndrome protein (WASP)-interacting protein (WIP)
Ypr089w	Ypr089w	Cytoplasm	0.09	4 13.5	3.8 4.6	2 3	3 5.6				0.557824		Hypothetical ORF
YBR102C	Exo84	bud	0	5	1.4	19.5	3.3	N/A	N/A	N/A	0.184265	known	Exocyst subunit with dual roles in exocytosis and spliceosome assembly; subunit of the the exocyst complex which mediates polarized targeting and tethering of post-Golgi secretory vesicles to active sites of exocytosis at the plasma membrane (PM) prior to SNARE-mediated fusion; required for exocyst assembly and targeting the complex to specific sites on the bud tip PM; associates the U1 snRNP; ro…
YHR182W	Rgd3	bud	0	4	1.3	21	1.3				0.397025		GTPase activating protein (GAP) for Rho3p, involved in cell polarity green fluorescent protein (GFP)-fusion protein localizes to the cell periphery and cytoplasm; relocalizes from bud neck to cytoplasm upon DNA replication stress
YHR149C	Skg6	bud	23.26	7	1.3	18	3.3				0.715639		Integral membrane protein; localizes primarily to growing sites such as the bud tip or the cell periphery; potential Cdc28p substrate; Skg6p interacts with Zds1p and Zds2p; SKG6 has a paralog, TOS2, that arose from the whole genome duplication
YLR114C	Avl9	bud	0	6	3.3	10	5.6				0.629033		Conserved protein involved in exocytic transport from the Golgi; mutation is synthetically lethal with apl2 vps1 double mutation; member of a protein superfamily with orthologs in diverse organisms; relocalizes from bud neck to cytoplasm upon DNA replication stress
YMR192W	Gyl1	bud	0	3.5	2.9	21.5	4.3				0.490978		Putative GTPase activating protein (GAP) with a role in exocytosis; stimulates Gyp5p GAP activity on Ypt1p, colocalizes with Gyp5p at sites of polarized growth; interacts with Gyp5p, Rvs161p, and Rvs167p; involved in recruiting Rvs167p to the bud tip during polarized growth; increases in abundance and relocalizes from bud neck to cytoplasm upon DNA replication stress; GYL1 has a paralog, GYP5, th…
YKR090W	Pxl1	bud	0	14.5	2.8	10.5	6				0.479043		Protein that localizes to sites of polarized growth; required for selection and/or maintenance of polarized growth sites, may modulate signaling by the GTPases Cdc42p and Rho1p; contains LIM domains and has similarity to metazoan paxillin; relocalizes from bud neck to cytoplasm upon DNA replication stress
YFL047W	Rgd2	bud	0	4.5	1.3	14.5	5.5				0.450144		GTPase-activating protein (RhoGAP) for Cdc42p and Rho5p; relocalizes from bud neck to cytoplasm upon DNA replication stress
YIR003W	Aim21	Actin	0	4.5 7.5	3.6 9.7	1.5 17.5	5.9 9.7				0.424538		Subunit of a complex that associates with actin filaments; forms a complex with Tda2p that inhibits barbed end F-actin assembly; elevates actin monomer pools to increase endocytotic efficiency and to regulate the distribution of actin between cables and patches; Aim21p/Tda2p forms a larger complex with actin capping proteins Cap1p and Cap2p; involved in mitochondrial migration along actin filamen…
YBR260C	Rgd1	bud	0.01	1.5	5.2	15	11.6				0.341829		GTPase-activating protein (RhoGAP) for Rho3p and Rho4p; involved in repolarization of actin cytoskeleton during adaptation to heat shock stress; phosphorylated by Pkc1p
YKL079W	Smy1	bud	0.02	4	1	20.5	3.1				0.364618		Kinesin-like myosin passenger-protein; interacts with Myo2p and enhances its interaction with Sec4p during transport of secretory vesicles; controls actin cable structure and dynamics
YDR129C	Sac6	Actin	0.02	4.5	2.9	7	9.4				0.787402		Fimbrin, actin-bundling protein; cooperates with Scp1p in organization and maintenance of the actin cytoskeleton; phosphorylated by Cdc28p/Clb2p in metaphase on T103, to regulate conformation, and modulate actin filament binding affinity and actin cable dynamics; relocalizes from the plasma membrane to the cytoplasm upon DNA replication stress; human homologs PLS3 and LCP1 implicated in spinocere…
YDL203C	Ack1	bud	0.01	0.5	0.3	21	4.3				0.464818		Protein that functions in the cell wall integrity pathway; functions upstream of Pkc1p; GFP-fusion protein expression is induced in response to the DNA-damaging agent MMS; non-tagged Ack1p is detected in purified mitochondria
YOR181W	Las17	Actin	0.01	3.5	2.4	3	9.1	S	S	S	1.51348		Actin assembly factor; C-terminal WCA domain activates Arp2/3 complex-mediated nucleation of branched actin filaments, polyproline domain nucleates actin filaments independent of Arp2/3; mutants are defective in endocytosis, bud site selection, cytokinesis; human homolog WAS (Wiskott-Aldrich Syndrome) implicated in severe immunodeficiency; human WAS complements yeast null mutant, but only in pres…
YNL020C	Ark1	Actin	0.04	6	4.8	1.5	4.2				2.33431		Ser/Thr protein kinase; phosphorylates Pan1p-Sla1p-End3p protein complex subunits, Pan1p and Sla1p; involved in regulation of the cortical actin cytoskeleton and endocytosis; functional overlap with PRK1
YOR239W	Abp140	Actin	0.01	3 9	5.4 10	1.5 2.5	2.2 4.5				1.19726		AdoMet-dependent tRNA methyltransferase and actin binding protein; C-terminal domain is responsible for 3-methylcytidine modification of residue 32 of the tRNA anticodon loop of tRNA-Thr and tRNA-Ser and contains an S-adenosylmethionine (AdoMet) binding motif; N-terminal actin binding sequence interacts with actin filaments and localizes to actin patches and cables; N- and C-terminal domains are …
YHR161C	Yap1801	bud	0.12	4	1.4	17.25	3.9				1.12241		Protein of the AP180 family, involved in clathrin cage assembly; binds Pan1p and clathrin; YAP1801 has a paralog, YAP1802, that arose from the whole genome duplication
YHR114W	Bzz1	Actin	0	6.5	0.7	12	3.5				0.755411		SH3 domain protein implicated in regulating actin polymerization; able to recruit actin polymerization machinery through its SH3 domains; colocalizes with cortical actin patches and Las17p; interacts with type I myosins
YCR088W	Abp1	Actin	0	8 12	1.3 2.2	1 6	0.9 3.5				0.3621		Actin-binding protein of the cortical actin cytoskeleton; important for activation of actin nucleation mediated by the Arp2/Arp3 complex; inhibits actin filament elongation at the barbed-end; phosphorylation within its proline-rich region, mediated by Cdc28p and Pho85p, protects Abp1p from PEST sequence-mediated proteolysis; mammalian homolog of HIP-55 (hematopoietic progenitor kinase 1 [HPK1]-in…
YGR241C	Yap1802	bud	0.1	3	2.4	22	2.4				0.537344		Protein of the AP180 family, involved in clathrin cage assembly; binds Pan1p and clathrin; YAP1802 has a paralog, YAP1801, that arose from the whole genome duplication
YPR171W	Bsp1	Actin	0	10.5	7.8	2.5	6.3				1.07076		Adapter that links synaptojanins to the cortical actin cytoskeleton; the synaptojanins are Inp52p and Inp53p
YBR200W	Bem1	bud	0.12	12	7.3	13	9.3				0.656991		Protein containing SH3-domains; involved in establishing cell polarity and morphogenesis; functions as a scaffold protein for complexes that include Cdc24p, Ste5p, Ste20p, and Rsr1p
YNL138W	Srv2	Actin	0.35	6 12.5	2.3 3.8	1 5.5	0.6 4.5		S		1.34338		CAP (cyclase-associated protein); N-terminus binds adenylate cyclase and facilitates activation by RAS; N-terminus forms novel hexameric star-shaped shuriken structures that directly catalyze cofilin-mediated severing of actin filaments; C-terminus binds and recycles cofilin bound, ADP-actin monomers, facilitating regulation of actin dynamics and cell morphogenesis; N- and C-termini can function …
YGR229C	Smi1	bud	0.02	5	2.3	1	0.9	S	S		1.2012		Protein involved in the regulation of cell wall synthesis; proposed to be involved in coordinating cell cycle progression with cell wall integrity
YOL112W	Msb4	bud	1.21	5	0.3	19.5	4.8				0.248877		GTPase-activating protein of the Ras superfamily; acts primarily on Sec4p, localizes to the bud site and bud tip; msb3 msb4 double mutation causes defects in secretion and actin organization; similar to the TBC-domain Tre2 oncogene; MSB4 has a paralog, MSB3, that arose from the whole genome duplication; human homolog USP6NL can complement yeast msb3 msb4 double null mutant
YDR388W	Rvs167	Actin	3.64	5	1.9	18.5	6.9	S	S	S	0.840781		Calmodulin-binding actin-associated protein; roles in endocytic membrane tabulation and constriction, and exocytosis; N-BAR domain protein that interacts with Rvs161p to regulate actin cytoskeleton, endocytosis, and viability following starvation or osmotic stress; recruited to bud tips by Gyl1p and Gyp5p during polarized growth; homolog of mammalian amphiphysin; necessary for efficient trafficki…
YDR348C	Pal1	bud	0	9	7.1	11.75	13.1				4.54611		Protein of unknown function thought to be involved in endocytosis; physically interacts with Ede1p and is found at endocytic sites at cell periphery during early stages of endocytosis; green fluorescent protein (GFP)-fusion protein localizes to bud neck; potential Cdc28p substrate; similar to S. pombe Pal1 protein; relocalizes from bud neck to cytoplasm upon DNA replication stress; PAL1 has a par…
YHR030C	Slt2	Cytoplasm	0.03	9 14.5	5 3.3	1 9	0.3 3.6		S		1.14649		Serine/threonine MAP kinase; coordinates expression of all 19S regulatory particle assembly-chaperones (RACs) to control proteasome abundance; involved in regulating maintenance of cell wall integrity, cell cycle progression, nuclear mRNA retention in heat shock, septum assembly; required for mitophagy, pexophagy; affects recruitment of mitochondria to phagophore assembly site; plays role in adap…
YDL091C	Ubx3	Cytoplasm	20.91	5.5	2.5	3.5	6				1.31875		Clathrin-coated vesicle component, regulator of endocytosis; copurifies with the DSC ubiquitin ligase complex; UBX (ubiquitin regulatory X) domain-containing protein that interacts with Cdc48p; required for efficient clathrin-mediated endocytosis; ortholog of fission yeast Ucp10
YDL161W	Ent1	Actin	0.01	4.5	1.5	15.5	6.4				1.29348		Epsin-like protein involved in endocytosis and actin patch assembly; functionally redundant with Ent2p; binds clathrin via a clathrin-binding domain motif at C-terminus; relocalizes from bud neck to cytoplasm upon DNA replication stress; ENT1 has a paralog, ENT2, that arose from the whole genome duplication
YJL020C	Bbc1	Actin	0	5.5	1.8	1	10.7				0.51077		Protein possibly involved in assembly of actin patches; interacts with an actin assembly factor Las17p and with the SH3 domains of Type I myosins Myo3p and Myo5p; localized predominantly to cortical actin patches
YNL084C	End3	Actin	0	12	4.5	2.5	4.2	S	S	S	1.69198		EH domain-containing protein involved in endocytosis; actin cytoskeletal organization and cell wall morphogenesis; forms a complex with Sla1p and Pan1p
YOL007C	Csi2	Vacuole	31.19	7	2.8	10.75	13.1				0.480822		Protein of unknown function; green fluorescent protein (GFP)- fusion protein localizes to the mother side of the bud neck and the vacuole; YOL007C is not an essential gene
YNR035C	Arc35	Actin	0.01	2.5	0.3	13.5	8.5	N/A	N/A	N/A	0.953841		Subunit of the ARP2/3 complex; ARP2/3 is required for the motility and integrity of cortical actin patches; required for cortical localization of calmodulin
YGR080W	Twf1	Actin	0.01	3 12.5	1.9 2.3	6 10	3.4 6.9				1.94225		Twinfilin; highly conserved actin monomer-sequestering protein involved in regulation of the cortical actin cytoskeleton; coordinates actin filament severing and monomer sequestering at sites of rapid actin turnover; composed of two cofilin-like regions, stimulates actin depolymerization as does the mouse homolog, mTwf1
YFL034C-B	Mob2	bud	0.01	7	3.5	15	9.1	N/A	N/A	N/A	0.951208		Activator of Cbk1p kinase; component of the RAM signaling network that regulates cellular polarity and morphogenesis; activation of Cbk1p facilitates the Ace2p-dependent daughter cell-specific transcription of genes involved in cell separation; similar to Mob1p
YOR104W	Pin2	bud	22.26	5.25	3.6	11.75	10				0.700646		Exomer-dependent cargo protein; induces appearance of [PIN+] prion when overproduced; prion-like domain serves as a retention signal in the trans-Golgi network; predicted to be palmitoylated
YIL034C	Cap2	Actin	0	6 15.5 19.5	3.8 4.2 1.3	1 4 2	0.6 4.3 2.6				0.404543		Beta subunit of the capping protein heterodimer (Cap1p and Cap2p); capping protein (CP) binds to the barbed ends of actin filaments preventing further polymerization; localized predominantly to cortical actin patches; protein increases in abundance and relocalizes from bud neck to plasma membrane upon DNA replication stress
YCR009C	Rvs161	Actin	0	4.5 16.5	2.8 4.5	2 1	9 1.7	S			1.31437		Amphiphysin-like lipid raft protein; N-BAR domain protein that interacts with Rvs167p and regulates polarization of the actin cytoskeleton, endocytosis, cell polarity, cell fusion and viability following starvation or osmotic stress
YKR100C	Skg1	bud	22.83	14	5.6	5	2.3				1.47102		Transmembrane protein with a role in cell wall polymer composition; localizes on inner surface of plasma membrane at bud and in daughter cell; SKG1 has a paralog, AIM20, that arose from the whole genome duplication
YKL013C	Arc19	Actin	0.13	5	2.3	7	9.4	N/A	N/A	N/A	0.974641		Subunit of the ARP2/3 complex; ARP2/3 is required for the motility and integrity of cortical actin patches; mutation is functionally complemented by human ARPC4
YIL138C	Tpm2	Actin	0	4.5	1.3	14.5	9.7				0.62406		Minor isoform of tropomyosin; binds to and stabilizes actin cables and filaments, which direct polarized cell growth and the distribution of several organelles; appears to have distinct and also overlapping functions with Tpm1p; TPM2 has a paralog, TPM1, that arose from the whole genome duplication
YPL144W	Poc4	Cytoplasm	0.01	6.25	1.8	18.75	1.8			S	1.00134		Component of a heterodimeric Poc4p-Irc25p chaperone; involved in assembly of alpha subunits into the 20S proteasome; may regulate formation of proteasome isoforms with alternative subunits under different conditions; upregulates proteasome assembly in response to the unfolded protein response activated by mistargeting of proteins (UPRam)
YBR016W	Cpp1	bud	1.04	7.5	2.8	3	2.9				0.575289		Tail-anchored plasma membrane protein with a conserved CYSTM module; predicted to be palmitoylated; has similarity to hydrophilins, which are involved in the adaptive response to hyperosmotic conditions; YBR016W has a paralog, YDL012C, that arose from the whole genome duplication
YOR304C-A	Bil1	bud	0	2	1.3	23	3.9				0.178331		Protein that binds Bud6p and has a role in actin cable assembly; involved in the Bnr1p-dependent pathway of cable assembly; localizes to bud tip and bud neck
YDR122W	Kin1	Cytoplasm	0.03	14	1.6	10.5	2.5				1.43739		S/T protein kinase; regulates polarized exocytosis and the Ire1p-mediated unfolded protein response; regulates HAC1 mRNA translocation, splicing and translation with KIN2 during ER stress; direct phosphorylation of the substrate Sec9p (S190) is enhanced by prior substrate priming (S192); localizes to the cytoplasmic face of the plasma membrane; activation loop phosphorylation (T302) required for …
YDR093W	Dnf2	bud	209.14	4	0.3	21	1.6		S		0.743582	known	Aminophospholipid translocase (flippase); type 4 P-type ATPase; involved in phospholipid translocation, contributing to endocytosis, protein transport, and cellular polarization; localizes primarily to the plasma membrane; localizes to the shmoo tip where it has a redundant role in the cellular response to mating pheromone; DNF2 has a paralog, DNF1, that arose from the whole genome duplication
YDR166C	Sec5	bud	0.05	3	2.4	22	4.4	N/A	N/A	N/A	0.17481	known	Essential 107kDa subunit of the exocyst complex; the exocyst mediates polarized targeting and tethering of post-Golgi secretory vesicles to active sites of exocytosis at the plasma membrane prior to SNARE-mediated fusion; involved in assembly of the exocyst complex; required with Sec3p for ER inheritance where it promotes anchoring of the cortical ER at the bud tip
YNL243W	Sla2	actin	0.4	3 7.5	1.5 8.2	1.5 13.5	10.3 8	S	S	S	0.723464		Adaptor protein that links actin to clathrin and endocytosis; involved in membrane cytoskeleton assembly and cell polarization; present in the actin cortical patch of the emerging bud tip; dimer in vivo
YER166W	Dnf1	bud	210.6	4	1.8	15	4.4				0.517704	known	Aminophospholipid translocase (flippase); type 4 P-type ATPase; involved in phospholipid translocation, contributing to endocytosis, protein transport, and cellular polarization; localizes primarily to the plasma membrane; localizes to the shmoo tip where it has a redundant role in the cellular response to mating pheromone; DNF1 has a paralog, DNF2, that arose from the whole genome duplication
YIR006C	Pan1	actin	0	4	2.5	8.5	10.4	N/A	N/A	N/A	0.771554		Part of actin cytoskeleton-regulatory complex Pan1p-Sla1p-End3p; associates with actin patches on cell cortex; promotes protein-protein interactions essential for endocytosis; binds to and activates Arp2/3 complex in vitro; phosphorylation of Thr-1225 is regulated by MAPK Hog1p in response to osmotic stress; previously thought to be a subunit of poly(A) ribonuclease
YBR023C	Chs3	bud	138.24	11.25	12.4	1.5	0.7				1.13789	known	Chitin synthase III; catalyzes the transfer of N-acetylglucosamine (GlcNAc) to chitin; required for synthesis of the majority of cell wall chitin, the chitin ring during bud emergence, and spore wall chitosan; contains overlapping di-leucine and di-acidic signals that mediate, respectively, intracellular trafficking by AP-1 and trafficking to plasma membrane by exomer complex; requires AP-3 compl…
YPL221W	Flc1	bud	229.98	10	2.9	15	6				0.794329		Flavin adenine dinucleotide transporter; required for uptake of FAD into endoplasmic reticulum; involved in cell wall maintenance; FLC1 has a paralog, FLC3, that arose from the whole genome duplication
YJR005W	Apl1	bud	2.77	2	0.8	10.5	10.5	S			1.87737		Beta-adaptin; large subunit of the clathrin associated protein complex (AP-2); involved in vesicle mediated transport; similar to mammalian beta-chain of the clathrin associated protein complex
YNL272C	Sec2	bud	0.01	3.75	4.7	14	9.4	N/A	N/A	N/A	0.393488		Guanyl-nucleotide exchange factor for the small G-protein Sec4p; essential for post-Golgi vesicle transport and for autophagy; associates with the exocyst, via exocyst subunit Sec15p, on secretory vesicles
YBL061C	Skt5	bud	0	6	2.8	19	2.8				1.31271		Activator of Chs3p (chitin synthase III) during vegetative growth; recruits Chs3p to the bud neck via interaction with Bni4p; SKT5 has a paralog, SHC1, that arose from the whole genome duplication
YOL019W	Tos7	bud	93.64	9.5	3.5	2.5	6				1.0277		Protein involved in secretion and cell wall organization; localizes to plasma membrane microdomains called MCCs (membrane compartment occupied by Can1); GFP-fusion protein localizes to the cell periphery and vacuole; Sur7/PalI family transmembrane domain (TMD) containing protein; TOS7 has a paralog, DCV1, that arose from the whole genome duplication
YMR238W	Dfg5	ER	24.98	7	1.8	17.5	1.8				0.870091		Putative mannosidase; essential glycosylphosphatidylinositol (GPI)-anchored membrane protein required for cell wall biogenesis in bud formation, involved in filamentous growth, homologous to Dcw1p
YER118C	Sho1	bud	84.65	5	3.6	15	6.3				0.958626		Transmembrane osmosensor for filamentous growth and HOG pathways; involved in activation of the Cdc42p- and MAP kinase-dependent filamentous growth pathway and the high-osmolarity glycerol (HOG) response pathway; phosphorylated by Hog1p; interacts with Pbs2p, Msb2p, Hkr1p, and Ste11p
YIL117C	Prm5	Vacuole	23.04	15	11.3	10	11.3		S		0.44138		Pheromone-regulated protein, predicted to have 1 transmembrane segment; induced during cell integrity signaling; PRM5 has a paralog, YNL058C, that arose from the whole genome duplication
YOR008C	Slg1	bud	23.52	3.5	0.6	12	4.4	S			0.90816		Sensor-transducer of the stress-activated PKC1-MPK1 kinase pathway; involved in maintenance of cell wall integrity; required for mitophagy; involved in organization of the actin cytoskeleton; secretory pathway Wsc1p is required for the arrest of secretion response
YJR058C	Aps2	bud	0.34	9 15.5	5.3 4.6	2 7	0.3 6.9	S			3.33352		Small subunit of the clathrin-associated adaptor complex AP-2; AP-2 is involved in protein sorting at the plasma membrane; related to the sigma subunit of the mammalian plasma membrane clathrin-associated protein (AP-2) complex
YNR049C	Mso1	bud	0	2	1.3	23	3				0.308385		Lipid-interacting protein in SNARE complex assembly machinery; acts at late step in secretion; interacts with membranes through two distinct binding sites; shows genetic and physical interactions with Sec1p; required for prospore membrane formation during sporulation; N-terminus closely associates with plasma membrane, C-terminus colocalizes with Sec4p on intracellular membranes; relocalizes from…
x	x	x	x	x	x	x	x	x	x	x	x	x	x	x
