# Supplementary material for: Large-scale identification of plasma membrane repair proteins revealed spatiotemporal cellular responses to plasma membrane damage
Source: eLife. 2026 Mar 10;14:RP108585. doi: 10.7554/eLife.108585 (PMC12975127; doi:10.7554/eLife.108585)
Supplement: Supplementary file 1. [file elife-108585-supp1.xlsx]

## Sheet: Table_S1_Yeasts
Strain Name	Genotype	Source
BY23849 (BY4741)	MATa his3Δ1 leu2Δ0 met15Δ0 ura3Δ0	NBRP
YKK2945	MATa his3Δ1 leu2Δ0 met15Δ0 ura3Δ0 PKC1::sfGFP::kanMX	Yamazaki and Kono 2022
YKK2946	MATa his3Δ1 leu2Δ0 met15Δ0 ura3Δ0 EXO70::mNG::kanMX	Yamazaki and Kono 2022
YKK4138	MATa his3Δ1 leu2Δ0 met15Δ0 ura3Δ0 MYO2::sfGFP::kanMX	This study
YKK4139	MATa his3Δ1 leu2Δ0 met15Δ0 ura3Δ0 EXO70::mNG::kanMX sla1Δ::sigmaLEU2	This study
YKK4140	MATa his3Δ1 leu2Δ0 met15Δ0 ura3Δ0 PKC1::sfGFP::kanMX sla1Δ::sigmaLEU2	This study
YKK4141	MATa his3Δ1 leu2Δ0 met15Δ0 ura3Δ0 rvs167Δ:: kanMX	This study
YKK4142	MATa his3Δ1 leu2Δ0 met15Δ0 ura3Δ0 DNF1::mNG::kanMX Ede1::mScarletI::hphNT	This study
YKK4143	MATa his3Δ1 leu2Δ0 met15Δ0 ura3Δ0 DNF1::mNG::kanMX EDE1::mScarletI::hphNT rvs167Δ::LEU2	This study
YKK4144	MATa his3Δ1 leu2Δ0 met15Δ0 ura3Δ0 PKC1::sfGFP::kanMX DNF1::mScarletI::hphNT	This study
YKK4145	MATa his3Δ1 leu2Δ0 met15Δ0 ura3Δ0 EDE1::mSc-I::hphNT	This study
YKK4146	MATa his3Δ1 leu2Δ0 met15Δ0 ura3Δ0 smi1Δ::kanMX	This study
YKK4147	MATa his3Δ1 leu2Δ0 met15Δ0 ura3Δ0 las17Δ::kanMX	This study
YKK4148	MATa his3Δ1 leu2Δ0 met15Δ0 ura3Δ0 skg6Δ::kanMX	This study
YKK4149	MATa his3Δ1 leu2Δ0 met15Δ0 ura3Δ0 end3Δ::kanMX	This study
YKK4150	MATa his3Δ1 leu2Δ0 met15Δ0 ura3Δ0 vrp1Δ::kanMX	This study
YKK4151	MATa his3Δ1 leu2Δ0 met15Δ0 ura3Δ0 sla2Δ::kanMX	This study
YKK4152	MATa his3Δ1 leu2Δ0 met15Δ0 ura3Δ0 EXO70::mNG::kanMX rvs167Δ::sigmaLEU2	This study
YKK4153	MATa his3Δ1 leu2Δ0 met15Δ0 ura3Δ0 SLG1::sfGFP::HIS3MX rvs167Δ::sigmaLEU2	This study
YKK4154	MATa his3Δ1 leu2Δ0 met15Δ0 ura3Δ0 SHO1::sfGFP::HIS3MX rvs167Δ::sigmaLEU2	This study
YKK4155	MATa his3Δ1 leu2Δ0 met15Δ0 ura3Δ0 EXO70::mNG::kanMX end3Δ::sigmaLEU2	This study
YKK4156	MATa his3Δ1 leu2Δ0 met15Δ0 ura3Δ0 EXO70::mNG::kanMX vrp1Δ::sigmaLEU2	This study
YKK4157	MATa his3Δ1 leu2Δ0 met15Δ0 ura3Δ0 MYO2::sfGFP::kanMX rvs167Δ::sigmaLEU2	This study
YKK4158	MATa his3Δ1 leu2Δ0 met15Δ0 ura3Δ0 MYO2::sfGFP::kanMX sla1Δ::sigmaLEU2	This study
YKK4159	MATa his3Δ1 leu2Δ0 met15Δ0 ura3Δ0 MYO2::sfGFP::kanMX end3Δ::sigmaLEU2	This study
YKK4160	MATa his3Δ1 leu2Δ0 met15Δ0 ura3Δ0 MYO2::sfGFP::kanMX vrp1Δ::sigmaLEU2	This study
YKK4161	MATa his3Δ1 leu2Δ0 met15Δ0 ura3Δ0 PKC1::sfGFP::kanMX end3Δ::LEU2	This study
YKK4162	MATa his3Δ1 leu2Δ0 met15Δ0 ura3Δ0 EXO70::mNeonGreen::KanMX EXO84::mScarlet-I::hphNT	This study
YKK4163	MATa his3Δ1 leu2Δ0 met15Δ0 ura3Δ0 EXO70::mNeonGreen::KanMX SEC3::mScarlet-I::hphNT	This study
YKK4164	MATa his3Δ1 leu2Δ0 met15Δ0 ura3Δ0 EXO70::mNeonGreen::KanMX SEC5::mScarlet-I::hphNT	This study
YKK4165	MATa his3Δ1 leu2Δ0 met15Δ0 ura3Δ0 EXO70::mNeonGreen::KanMX SEC6::mScarlet-I::hphNT	This study
YKK4166	MATa his3Δ1 leu2Δ0 met15Δ0 ura3Δ0 EXO70::mNeonGreen::KanMX SEC8::mScarlet-I::hphNT	This study
YKK4167	MATa his3Δ1 leu2Δ0 met15Δ0 ura3Δ0 EXO70::mNeonGreen::KanMX SEC10::mScarlet-I::hphNT	This study
YKK4168	MATa his3Δ1 leu2Δ0 met15Δ0 ura3Δ0 EXO70::mNeonGreen::KanMX SEC15::mScarlet-I::hphNT	This study
YKK4169	MATa his3Δ1 leu2Δ0 met15Δ0 ura3Δ0 PKC1::sfGFP::kanMX rvs167Δ::LEU2	This study
YKK4170	MATa his3Δ1 leu2Δ0 met15Δ0 ura3Δ0 PKC1::sfGFP::kanMX vrp1Δ::LEU2	This study
YKK4171	MATa his3Δ1 leu2Δ0 met15Δ0 ura3Δ0 BNI1::13xMyc::HIS3	This study
YKK4172	MATa his3Δ1 leu2Δ0 met15Δ0 ura3Δ0 BNI1::13xMyc::HIS3 rvs167Δ::LEU2	This study
YKK4173	MATa his3Δ1 leu2Δ0 met15Δ0 ura3Δ0 BNI1::13xMyc::HIS3 end3Δ::LEU2	This study
YKK4174	MATa his3Δ1 leu2Δ0 met15Δ0 ura3Δ0 SEC3::GFP::HIS3MX	Kono et al., 2012
YKK4175	MATa his3Δ1 leu2Δ0 met15Δ0 ura3Δ0 SEC3::GFP::HIS3MX rvs167Δ::LEU2	This study
YKK4176	MATa his3Δ1 leu2Δ0 met15Δ0 ura3Δ0 SEC3::GFP::HIS3MX end3Δ::LEU2	This study
YKK4177	MATa his3Δ1 leu2Δ0 met15Δ0 ura3Δ0 SLA1::mNG::kanMX ABP1::mScarletI::hphNT	This study
YKK4178	MATa his3Δ1 leu2Δ0 met15Δ0 ura3Δ0 SLA1::mNG::kanMX END3::mScarletI::hphNT	This study
YKK4179	MATa his3Δ1 leu2Δ0 met15Δ0 ura3Δ0 DNF1::mNG::kanMX Ede1::mScarletI::hphNT pkc1-2	This study
