# Supplementary material for: Large-scale identification of plasma membrane repair proteins revealed spatiotemporal cellular responses to plasma membrane damage
Source: eLife. 2026 Mar 10;14:RP108585. doi: 10.7554/eLife.108585 (PMC12975127; doi:10.7554/eLife.108585)
Supplement: Supplementary file 2. [file elife-108585-supp2.xlsx]

## Sheet: Table_S2_Libraries
Library name	Source
Yeast GFP collection	Huh et al., 2003
Yeast N' SWAT-GFP library	Yofe et al., 2016; Weill et al., 2018
Yeast deletion collection	Winzeler et al., 1999
