# Supplementary material for: Large-scale identification of plasma membrane repair proteins revealed spatiotemporal cellular responses to plasma membrane damage
Source: eLife. 2026 Mar 10;14:RP108585. doi: 10.7554/eLife.108585 (PMC12975127; doi:10.7554/eLife.108585)
Supplement: Supplementary file 3. [file elife-108585-supp3.xlsx]

## Sheet: Table_S3_Plasmids
Plasmid	Description	Source
pKK475	pRS316-Snc1p-mNeonGreen-Snc1	This study
pKK476	pRS316-PGAL-mNeonGreen-Snc1	This study
